# Supplementary material for: Salvia-Nelumbinis naturalis improves lipid metabolism of NAFLD by regulating the SIRT1/AMPK signaling pathway
Source: Springer Nature journal article supplement (doi:10.1186/s12906-022-03697-9), 2022-08-09

**Figure 2A.**

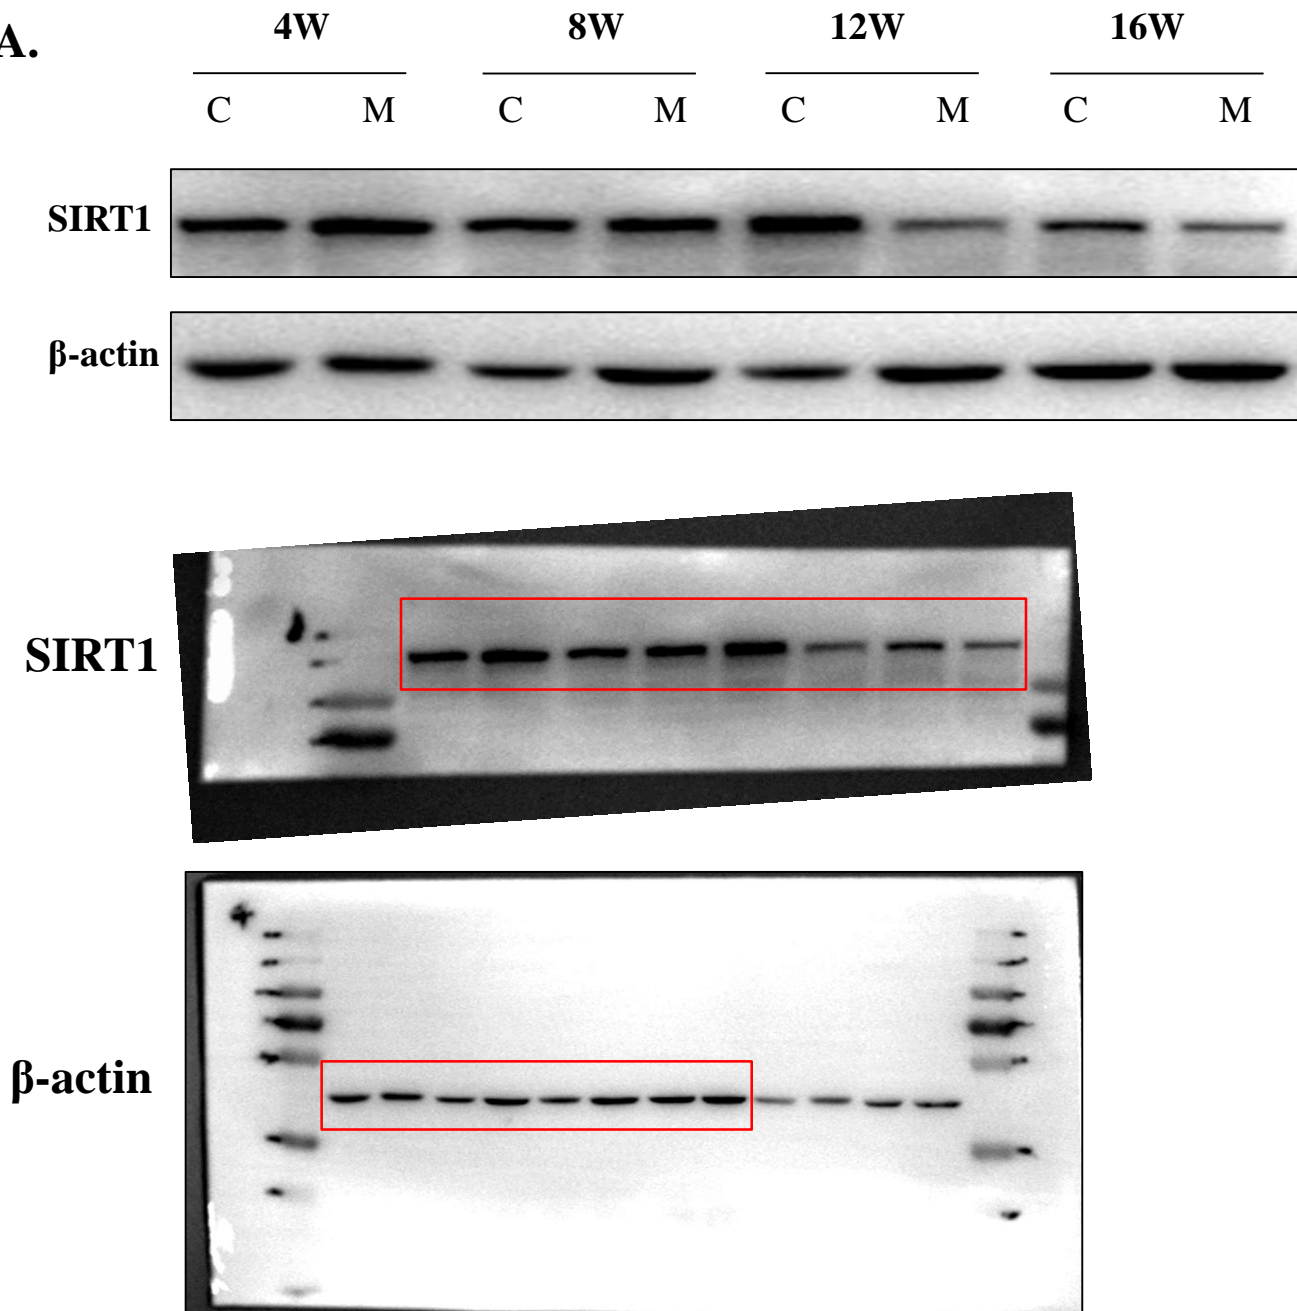

**Figure 2B.**

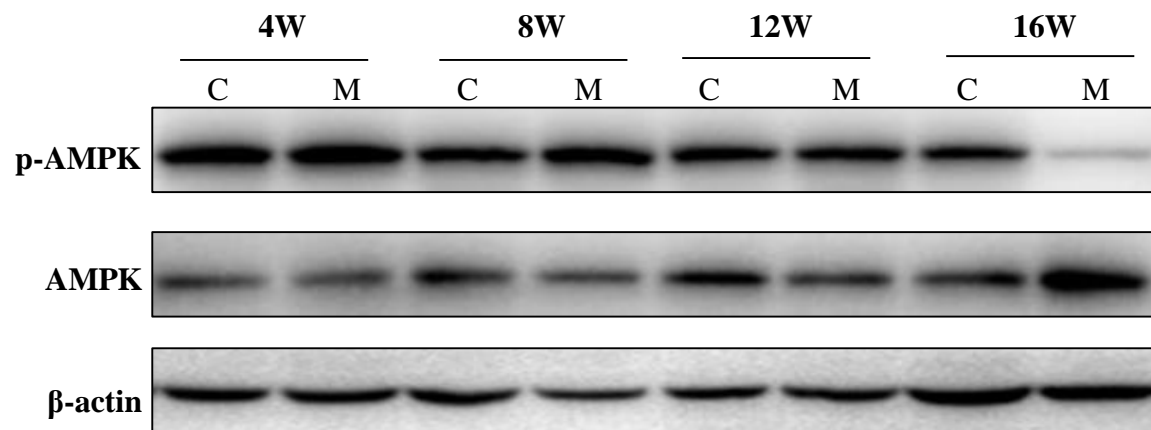

**p-AMPK**

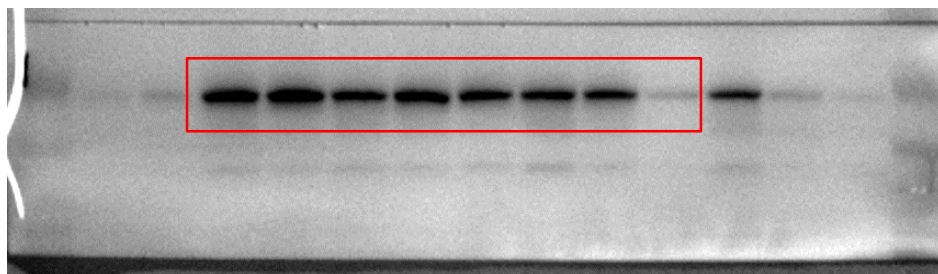

**AMPK**

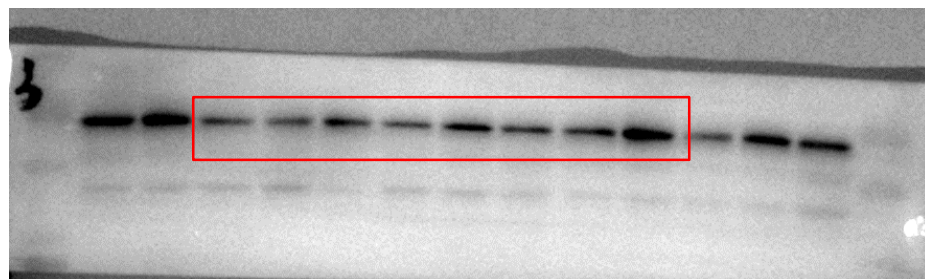

**$\beta$ -actin**

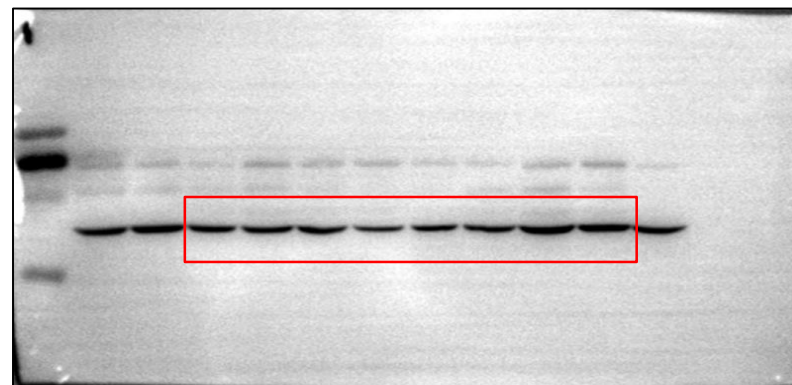

**Figure 4A.**

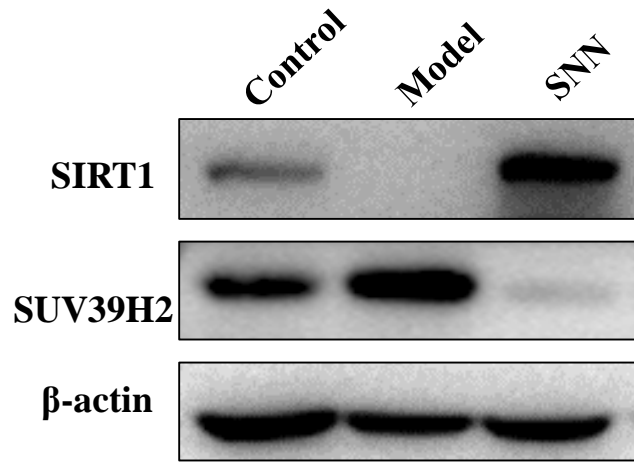

**SIRT1**

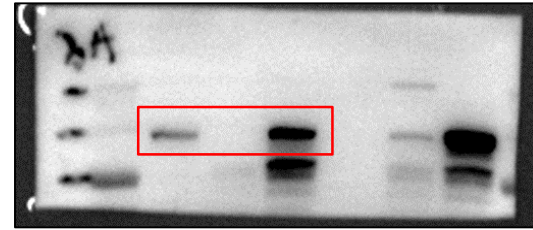

**SUV39H2**

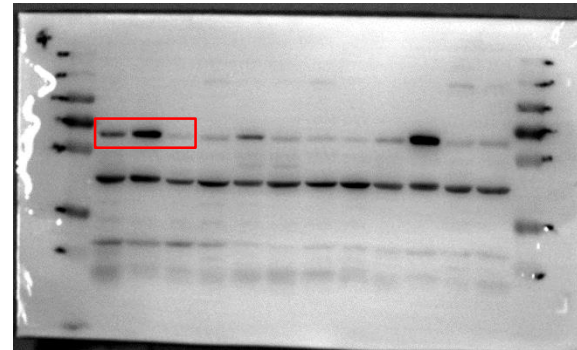

**$\beta$ -actin**

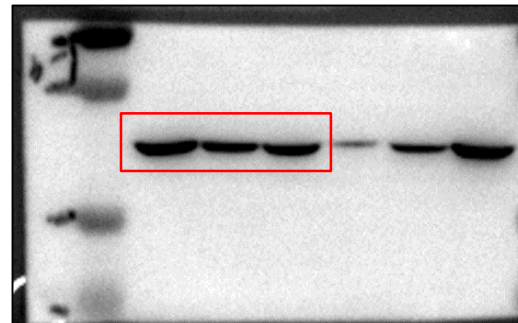

**Figure 4B.**

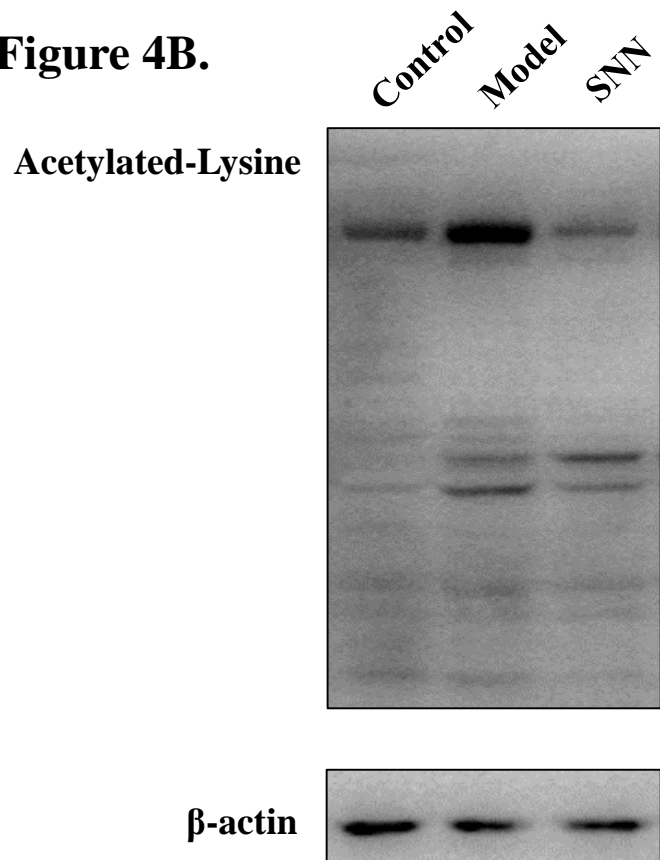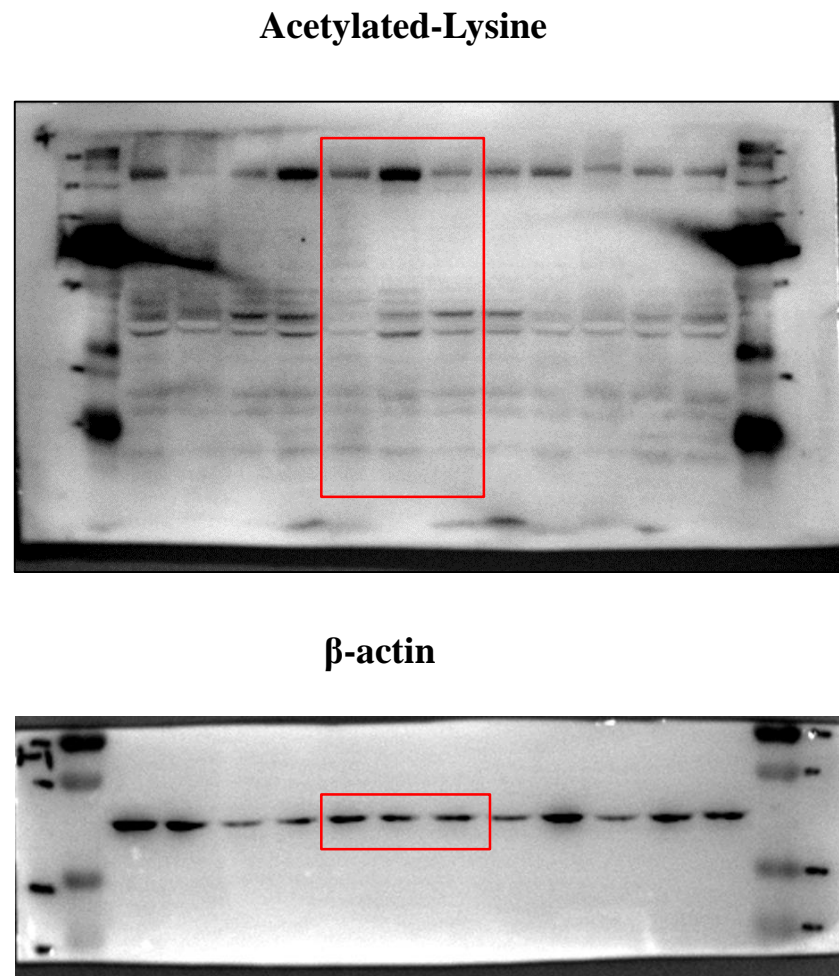

**Figure 4C.**

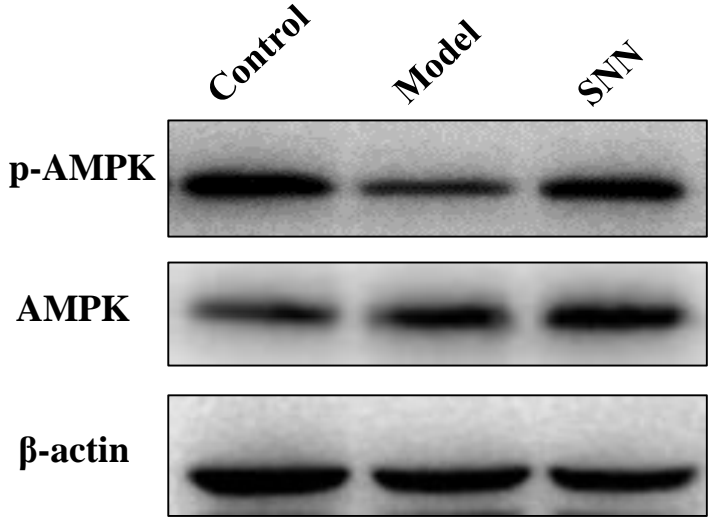

**p-AMPK**

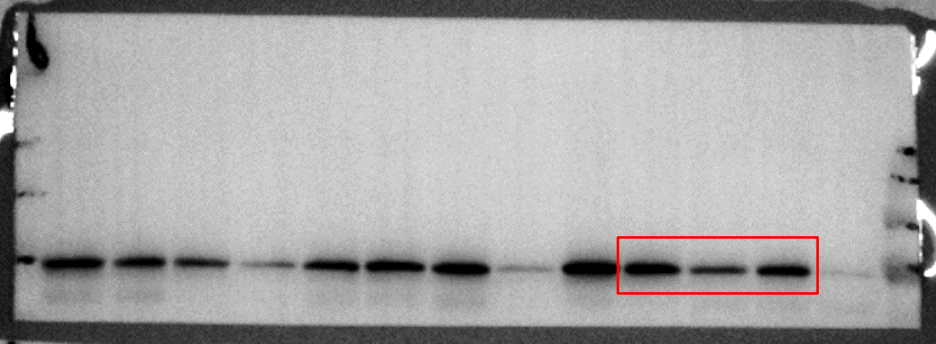

**AMPK**

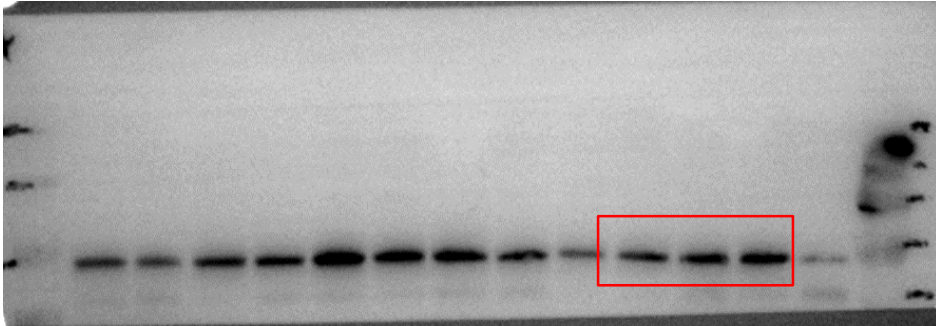

**$\beta$ -actin**

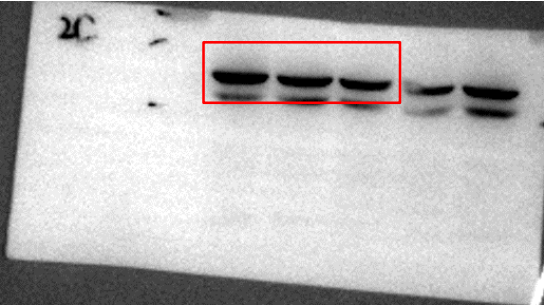

**Figure 5A.**

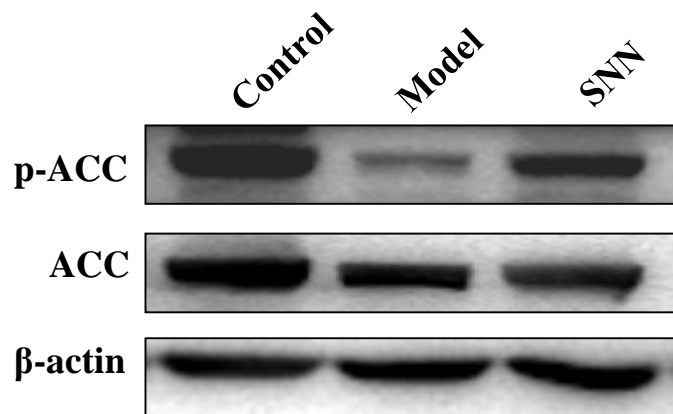

**p-ACC**

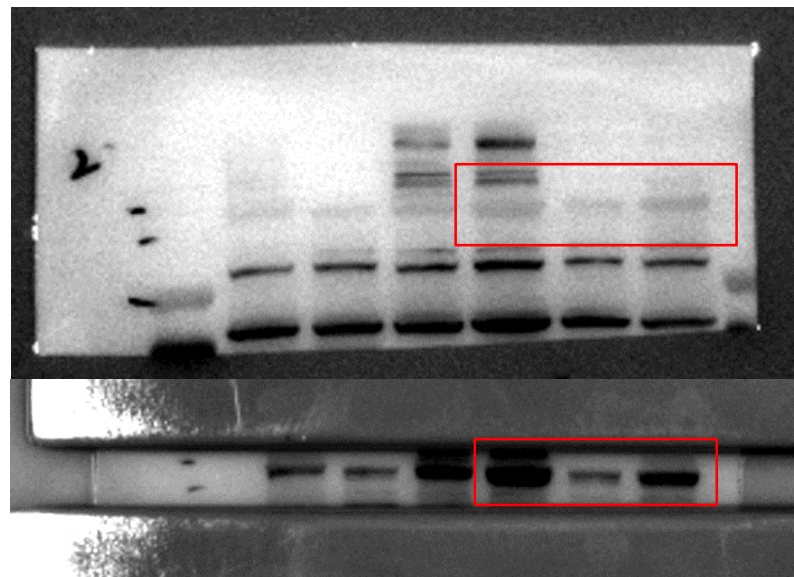

**ACC**

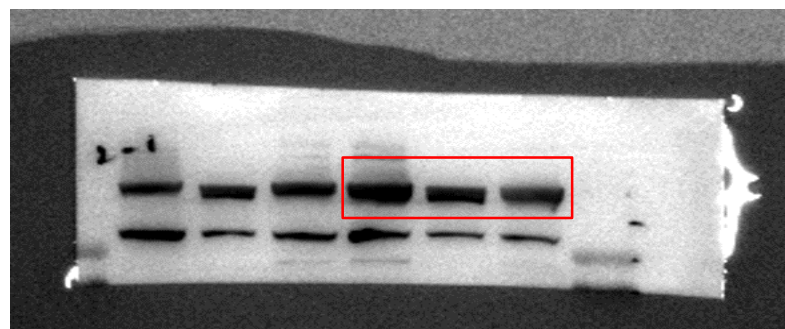

**$\beta$ -actin**

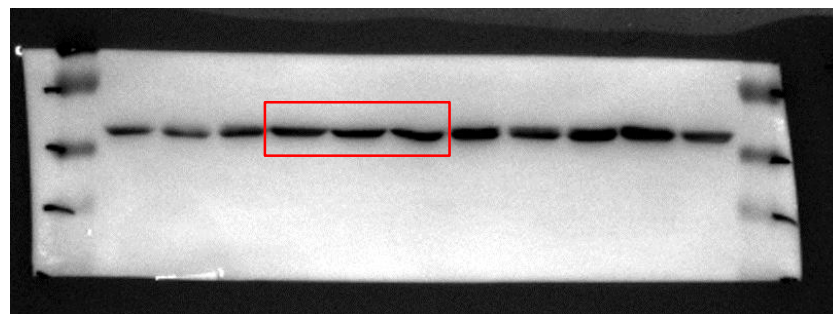

**Figure 5B.**

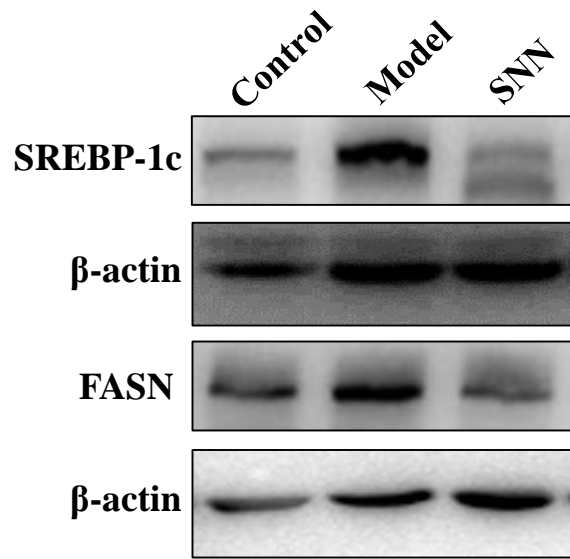

**SREBP-1c**

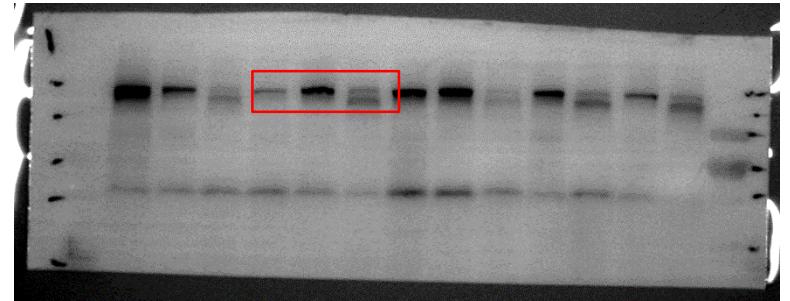

**$\beta$ -actin**

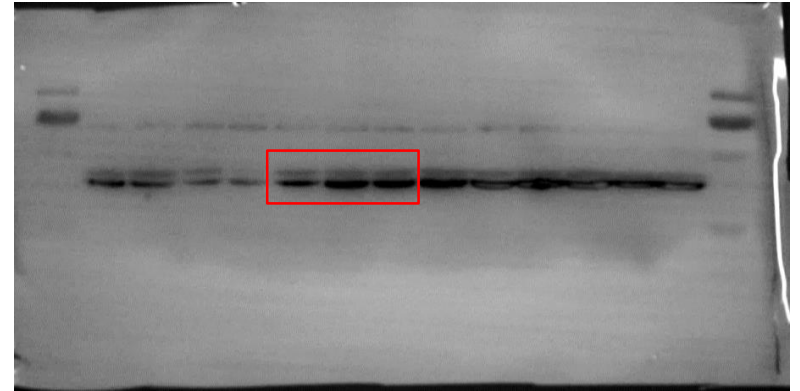

**FASN**

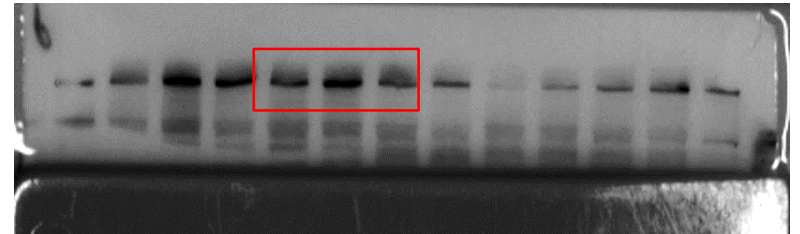

**$\beta$ -actin**

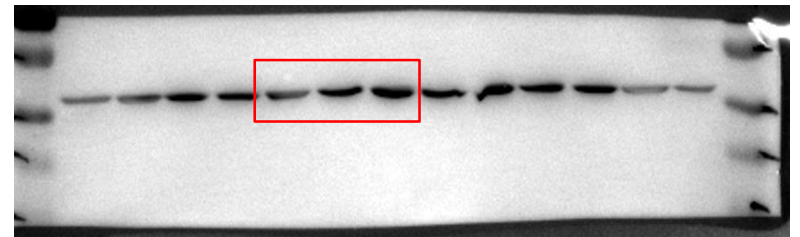

**Figure 5D.**

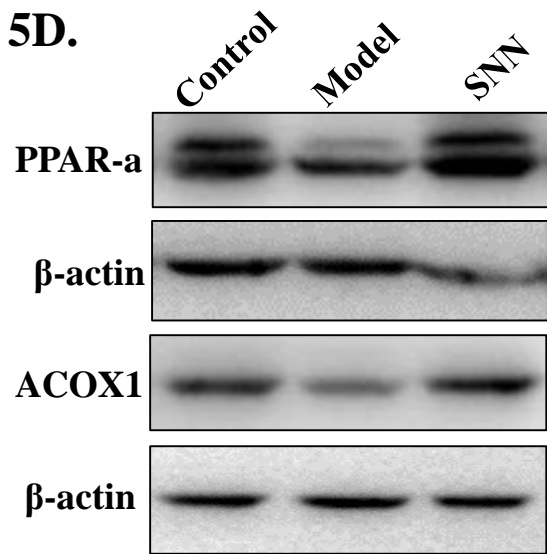

**PPAR-a**

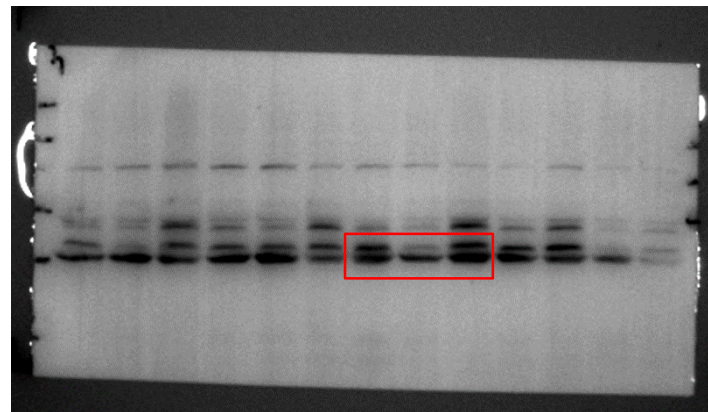

**$\beta$ -actin**

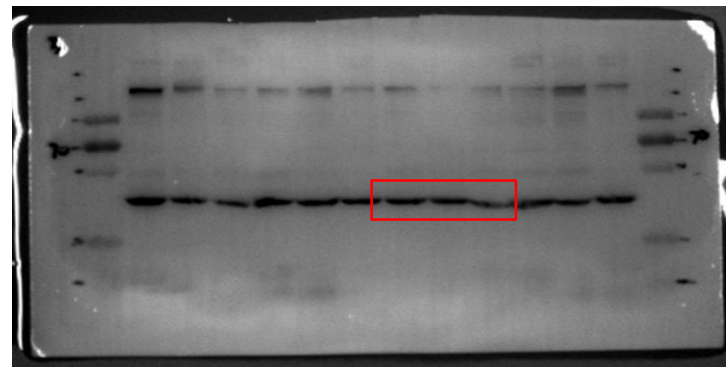

**ACOX1**

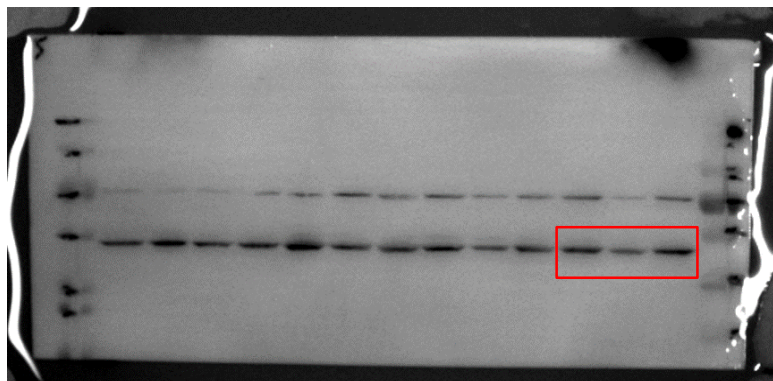

**$\beta$ -actin**

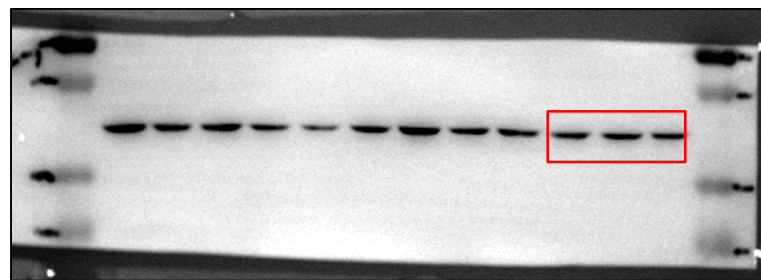

Supplement: MOESM1 [file 23350706]
